# Supplementary material for: EMP2 Serves as a Functional Biomarker for Chemotherapy-Resistant Triple-Negative Breast Cancer
Source: MDPI journal article supplement (doi:10.3390/cancers16081481), 2024-04-12
Supplement: s1 [file s1]

Table S1

| <b>Characteristics</b>   | <b>EMP2 increased after<br/>chemotherapy<br/>(yes/no)</b> | <b>p-value</b> |
|--------------------------|-----------------------------------------------------------|----------------|
| <b>Age</b>               |                                                           |                |
| median                   | 53 yrs                                                    | 0.93§§         |
| range                    | 26-72 yrs                                                 |                |
| <b>Ethnicity</b>         |                                                           |                |
| Caucasian                | 4                                                         | 1§             |
| Hispanic                 | 1                                                         |                |
| African American         | 2                                                         |                |
| Asian                    | 1                                                         |                |
| <b>Stage</b>             |                                                           |                |
| II                       | 6                                                         | 0.46 §         |
| III/IV                   | 2                                                         |                |
| <b>Lymph node spread</b> |                                                           |                |
| present                  | 5                                                         | 0.25 §         |
| absent                   | 3                                                         |                |
| <b>Menopausal status</b> |                                                           |                |
| pre-menopausal           | 4                                                         | 0.43 §         |
| post-menopausal          | 4                                                         |                |
| <b>Recurrence</b>        |                                                           |                |
| Yes                      | 6                                                         | 0.036 §        |
| No                       | 2                                                         |                |

§§ Spearman correlation

§ Fisher exact test
